# Supplementary material for: Effectiveness of amendments on re-acidification and heavy metal immobilization in an extremely acidic mine soil
Source: Royal Society of Chemistry journal article supplement (doi:10.1039/c1em10028a), 2011-01-01
Supplement: supplementaryinformation.pdf [file supplementaryinformation.pdf]

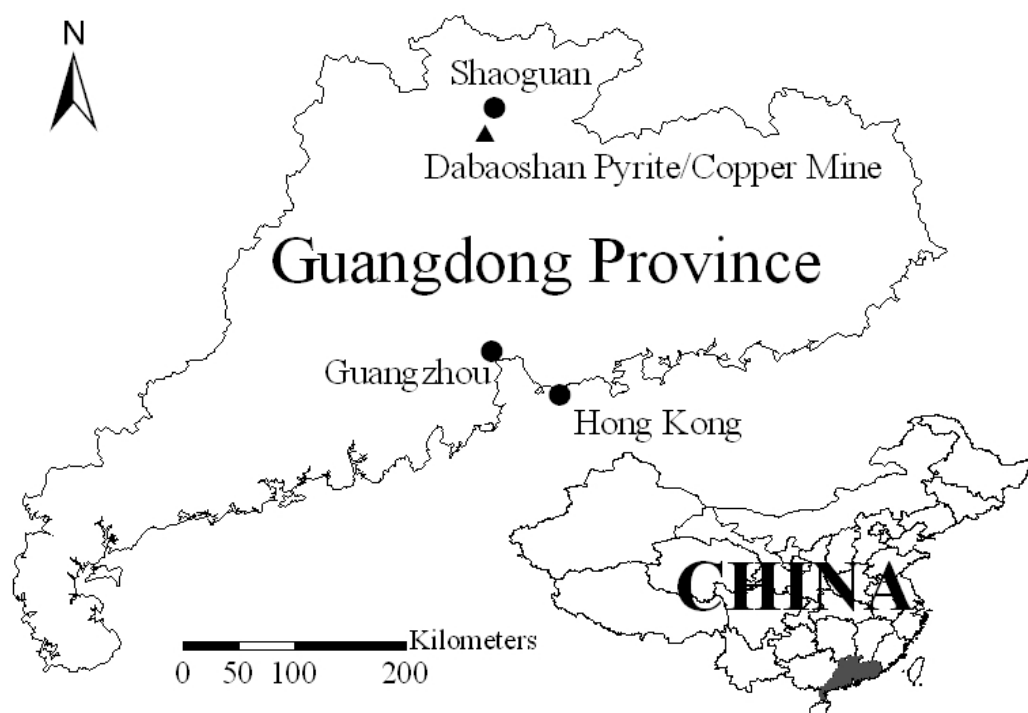

**Fig. S1** Map of Guangdong Province showing the location of Dabaoshan Pyrite/Copper Mine, where the mine soil used in this study was collected.
